# Supplementary material for: Representación de los espacios femeninos en las historias intercaladas del primer Quijote
Source: Atypon-hosted journal article supplement (doi:10.1187/cbe.09-03-0025), 2005-01-01
Supplement: supplemental_data_i.pdf [file supplemental_data_i.pdf]

**Supplemental Data I**  
**Questionnaire used to assess student attitudes in 2006<sup>1</sup>, 2007 and 2008**

The following questionnaire is anonymous. *Your feedback is very important in helping us to understand what aspects of the course need to be changed.* Thank you for your candid comments! Please indicate:

**Your Major:**

**Expected year of graduation:**

**Anticipated career path after graduation:**

1A. Please rank your *interest* in the subject matter covered in Introductory Biology II **BEFORE** taking the course (1= no interest at all, 5 = very interested).

1                      2                      3                      4                      5

1B. Please rank your *interest* in the subject matter covered in Introductory Biology II **AFTER** taking the course (1= no interest at all, 5 = very interested).

1                      2                      3                      4                      5

1C. If your interest in the material has changed (either increased or decreased) please explain why.

2A. Please rate the extent to which you feel the material covered in this course is relevant to your long term goals: **(1= not relevant, 5= highly relevant)**

1                      2                      3                      4                      5

2B. Please explain your answer to 2A above.

3A. Please rank each of the following elements of the lecture portion of this course according to how helpful you found them to be in terms of your learning. **(1 = not helpful, 5 = extremely helpful)**

|                                               |   |   |   |   |   |
|-----------------------------------------------|---|---|---|---|---|
| Clicker questions                             | 1 | 2 | 3 | 4 | 5 |
| Weekly quizzes                                | 1 | 2 | 3 | 4 | 5 |
| Group work in lecture                         | 1 | 2 | 3 | 4 | 5 |
| Vocabulary list                               | 1 | 2 | 3 | 4 | 5 |
| Daily dozens                                  | 1 | 2 | 3 | 4 | 5 |
| Learning goals                                | 1 | 2 | 3 | 4 | 5 |
| Recitation                                    | 1 | 2 | 3 | 4 | 5 |
| Forming your own study group outside of class | 1 | 2 | 3 | 4 | 5 |

---

<sup>1</sup> In 2006, before the course restructuring, the questionnaire did not include questions 3A and 3B, nor the parenthetical reference to clicker questions, quizzes, and group problem solving exercises in question 4A.

3B. Do you have any comments to make on your responses above? Do you have anything to add to this list?

4A. How well do you feel the lecture portion of this course (including clicker questions, quizzes, and group problem solving exercises) prepared you for examinations? (**1= not at all, 5 = extremely well**)

1                      2                      3                      4                      5

4B. How well do you feel your study strategy prepared you for examinations? (**1= not at all, 5 = extremely well**)

1                      2                      3                      4                      5

4C. Do you have any comments or clarifications for your answers to the above questions about exams (4A-4C)? Do you have anything to add about examinations?

5A. What specifically did you *like* about the lecture portion of the course? Please explain why.

5B. What specifically did you *dislike* about the lecture portion of the course? Please explain why.

6. What other comments would you like to add about any aspect of the lecture portion of this course? Please use the back of this page if you need more space.
