# Supplementary material for: Representación de los espacios femeninos en las historias intercaladas del primer Quijote
Source: Atypon-hosted journal article supplement (doi:10.1187/cbe.09-03-0025), 2005-01-01
Supplement: supplemental_data_iii.pdf [file supplemental_data_iii.pdf]

**Supplemental Data III**  
**Examples of student text and coding system for free responses to questionnaire**

| <b>Student text:</b>                                                                                                                                                                                                                     | <b>Codes and explanatory sub-codes:</b>                       |
|------------------------------------------------------------------------------------------------------------------------------------------------------------------------------------------------------------------------------------------|---------------------------------------------------------------|
| 1. I actually ended up liking working in <u>groups</u> although in the beginning I hated it. It really <u>facilitated learning</u> .                                                                                                     | code: groups<br>subcodes: facilitated learning                |
| 2. <u>Quizzes</u> helped keep the material fresh in my mind every week and gave me a reason to <u>review even without an exam</u> coming up. They <u>helped me learn</u> the material.                                                   | code: quizzes<br>subcodes: reviewed, helped me learn          |
| 3. <u>Lectures</u> went very <u>slowly</u> and seemed to <u>drag on</u> . The same amount of material could have been learned in a 50 min. lecture instead. Shorter lecture might keep me from <u>loosing interest in the material</u> . | code: lecture not stimulating<br>subcodes: too long, too slow |
